# Supplementary material
Source: Springer Nature journal article supplement (https://www.springermedizin.de/resource/supplementary/12943_2012_1127_MOESM7_ESM.pdf/9552506)

BLAST

RA+FICZ

NEUTROPHIL

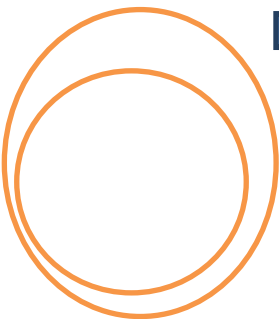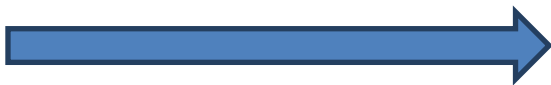

**Upregulation of:**

1. Signaling events:

- pRAF → pMEK → pERK
- c-Cbl, VAV1
- SFK: total Fgr, total Lyn, p-Y416 pan-SFK, pY507 Lyn
- pY458 p85 PI3K

2. Phenotypic markers:

- CD11b
- Respiratory burst activity (p47phox expression)
- G0/G1 arrest

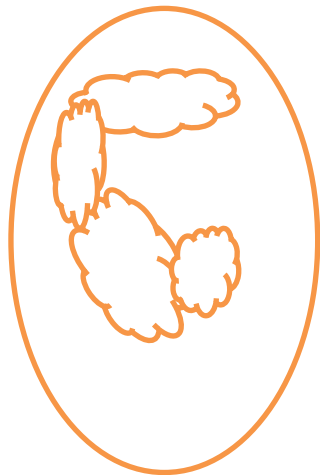

Supplement: MOESM7 [file 9552506]
